# Supplementary material
Source: PubMed Central journal article supplement (PMC6207342)
Supplement: NIHMS80144-supplement-Supplementarry_data.pdf [file NIHMS80144-supplement-Supplementarry_data.pdf]

# Supplementary DATA

## Intracellular replication of *Streptococcus pneumoniae* inside splenic macrophages serves as a reservoir for septicaemia

Giuseppe Ercoli<sup>1</sup>, Vitor E. Fernandes<sup>2</sup>, Wen Y. Chung<sup>3</sup>, Joseph J Wanford<sup>1</sup>, Sarah Thomson<sup>4</sup>, Christopher D. Bayliss<sup>1</sup>, Kornelis Straatman<sup>5</sup>, Paul R. Crocker<sup>4</sup>, Ashley Dennison<sup>3</sup>, Luisa Martinez-Pomares<sup>6</sup>, Peter W. Andrew<sup>2</sup>, E. Richard Moxon<sup>7</sup>, Marco R. Oggioni<sup>1,\*</sup>

<sup>1</sup> Department of Genetics, University of Leicester, UK

<sup>2</sup> Department of Infection Immunity and Inflammation, University of Leicester, UK

<sup>3</sup> Hepato-Pancreato-Biliary (HPB) Unit, Leicester General Hospital, University of Hospitals of Leicester, NHS Trust, UK

<sup>4</sup> Division of Cell Signalling and Immunology, School of Life Sciences, University of Dundee, UK

<sup>5</sup> Centre for Core Biotechnology Services, University of Leicester, UK

<sup>6</sup> School of Life Sciences, Faculty of Medicine & Health Sciences, University of Nottingham, UK

<sup>7</sup> Department of Pediatrics, University of Oxford, UK

\* Address correspondence to Marco R. Oggioni, to Department of Genetics, University of Leicester, LE1 7RH Leicester, UK; email [mro5@leicester.ac.uk](mailto:mro5@leicester.ac.uk); phone +44 116 2252261

## Index

- Supplementary Figure 1: Spleen compartments and infection time-course.
- Supplementary Figure 2: CD169+ splenic macrophages following 8-hour infection with *S. pneumoniae* TIGR4 and a D39 non-encapsulated mutant.
- Supplementary Figure 3: Distribution of foci of infection.
- Supplementary Figure 4: Quantification of mouse spleen compartments.
- Supplementary Figure 5: CD169 blocking and infection of CD169 knockout mouse strain.
- Supplementary Table 1: Antibodies and microscopy reagents .
- Supplementary Table 2: Detection of GFP and RFP labelled bacteria in splenic foci.
- Supplementary Table 3: Primers for construction of strains expressing recombinant *nanA*.

43  
44  
45

**a**

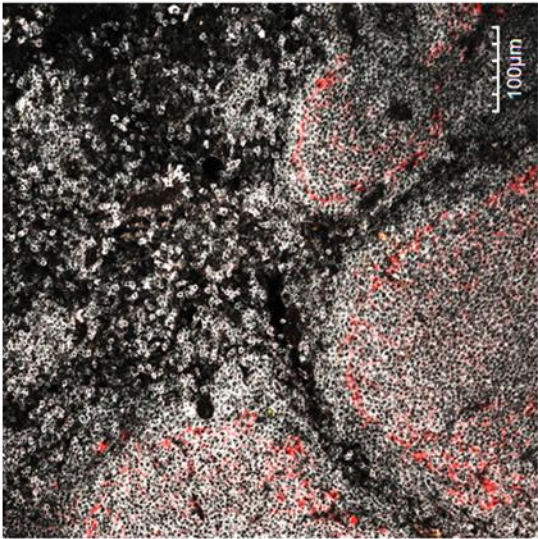

**b**

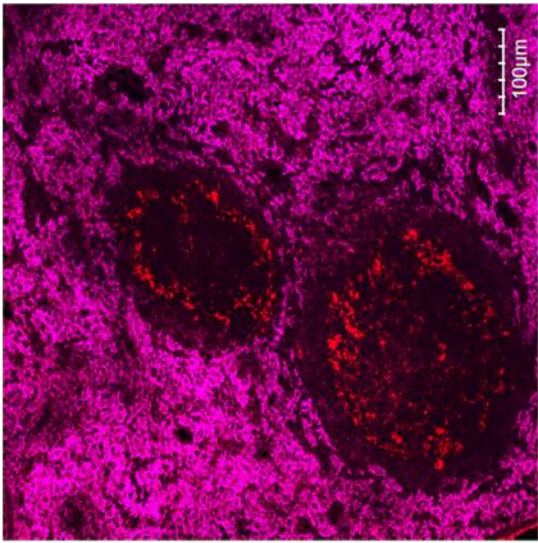

**c**

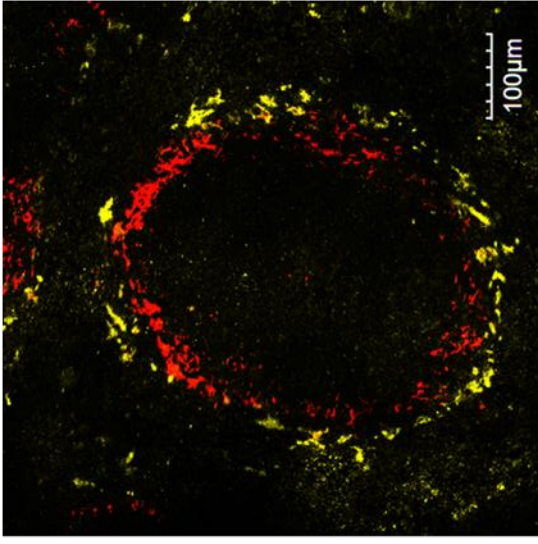

**d**

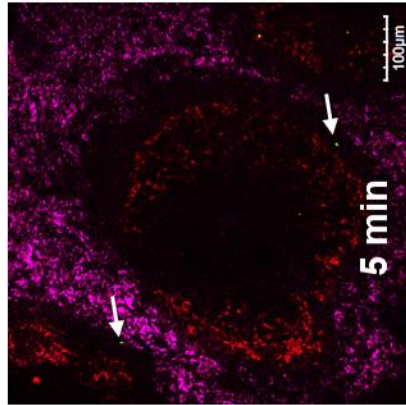

**e**

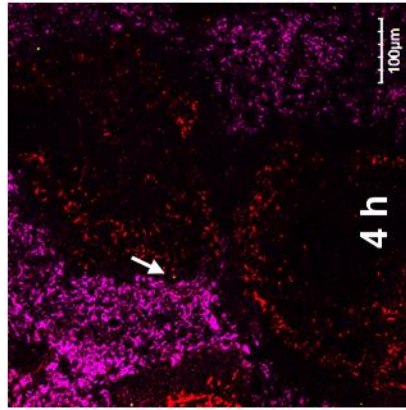

**f**

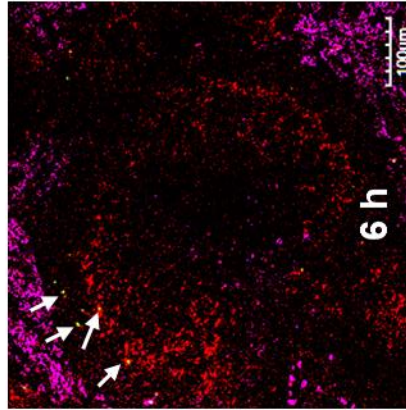

**g**

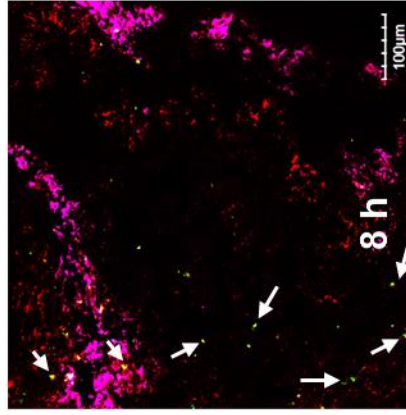

46 **Supplementary Figure 1: Spleen compartments and infection time-course.** CD1 mouse  
47 spleen sections have been stained with three different antibody combinations in order to  
48 show the spleen compartments. In panel a metallophilic CD169+ macrophages (red, Cr-Fc,  
49 AF568b) and B cells + T cells (white,  $\alpha$ -B220+ $\alpha$ -CD3, both AF647) are shown, in panel b  
50 metallophilic macrophages (red, Cr-Fc, AF568b) and red pulp macrophages (magenta,  $\alpha$ -  
51 F4/80, AF647), in panel c metallophilic macrophages (red, Cr-Fc, AF568b) and marginal  
52 zone macrophages (yellow, aSIGN-R1b, AF488s). Spleen sections of CD1 mice infected by  
53 *S. pneumoniae* D39 show an increase of number, and a change in localisation of the foci of  
54 infection over time (white arrows indicate bacterial clusters). After five minutes, single  
55 bacteria (green) can be observed exclusively in the marginal zone (area not stained between  
56 the red pulp in magenta and the metallophilic area in red) (d). At four hours after infection  
57 (e), the majority of the bacteria are cleared and there are only a few foci of pneumococci. At  
58 six hours post-infection (f) an increase in the number and in the size of the foci is observed  
59 in the metallophilic macrophages. At eight hours (g) the number of bacteria in most foci is  
60 much higher and clusters of bacteria can be found throughout the spleen. Bacteria were  
61 stained in green ( $\alpha$ -type2, AF488), red pulp macrophages in purple ( $\alpha$ -F4/80, AF647),  
62 metallophilic macrophages in red (CR-Fc, AF568) and nuclei in blue (DAPI). All the  
63 immunofluorescence images are representative of 5 sections from 3 different samples.  
64 Antibody details are in Table S1.

65  
66  
67  
68  
69  
70  
71  
72  
73  
74  
75  
76  
77  
78  
79

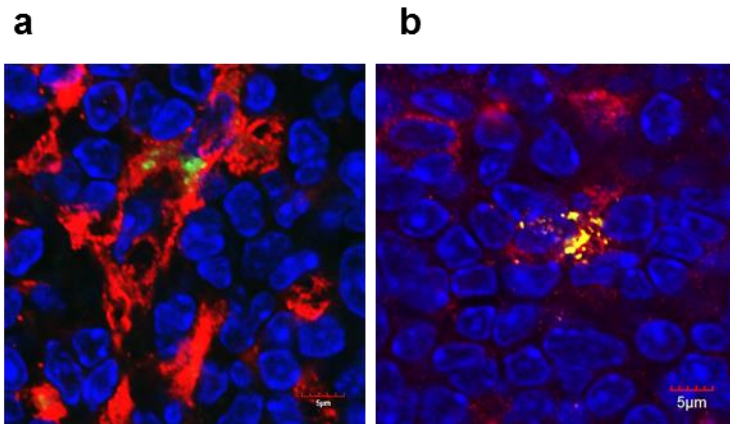

80

81

82

83 **Supplementary Figure 2: CD169+ splenic macrophages following 8-hour infection with**

84 ***S. pneumoniae* TIGR4 and a D39 non-encapsulated mutant.** CD1 mice, infected

85 intravenously with  $1 \times 10^6$  CFU of GFP-expressing non-encapsulated pneumococci, develop

86 foci of infection in the metallophilic zone macrophages (a). GFP expressing bacteria are

87 shown in green, CD169+ macrophages in red (CR-Fc, AF568) and nuclei are stained in blue

88 (DAPI). Panel b shows co-localisation of bacteria, and CD169+ macrophages also occurs in

89 TIGR4 infected spleens. Mice were infected with  $1 \times 10^6$  CFU of TIGR4 pneumococci (green,

90  $\alpha$ -type4, AF488). Metallophilic macrophages (red) and nuclei (blue) have been stained as

91 above. All the immunofluorescence images are representative of 5 sections from 3 different

92 samples. Antibody details are in Table S1.

93

94

95

96

97

98

99

100

101

102

103

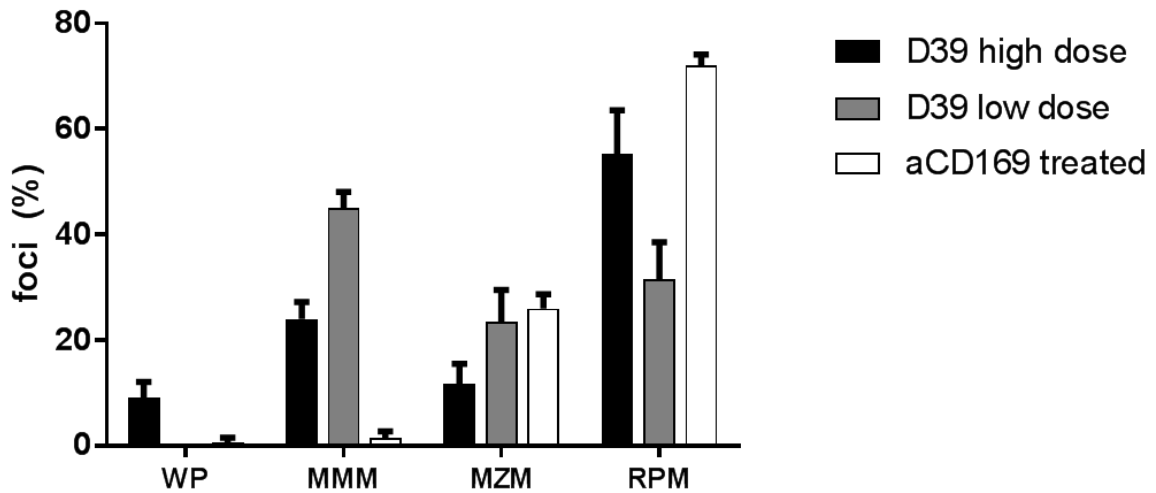

104 **Supplementary Figure 3: Distribution of foci of infection.** The figure shows the  
 105 distribution of the foci of pneumococci, at 6 h after infection, in the white pulp (WP), the  
 106 metallophilic macrophage area (MMM), the marginal zone macrophage area (MZM) and the  
 107 red pulp area (RP) of the murine spleen. Three groups of infected mice have been  
 108 considered in this analysis: mice infected with high dose ( $1 \times 10^6$  CFU) of wild-type D39 *S.*  
 109 *pneumoniae* (black bars), mice infected with low dose ( $1 \times 10^5$  CFU) of wild-type D39 *S.*  
 110 *pneumoniae* (grey bars) and mice infected with  $1 \times 10^6$  CFU of the D39 after administration of  
 111 anti-CD169 mAb (white bars). The data are shown as percentages of the total number of foci  
 112 counted. The counts were obtained from 30 random microscope fields from three  
 113 independent infected spleens. Error bars represent Standard deviation.

114  
 115  
 116  
 117  
 118  
 119  
 120  
 121  
 122  
 123  
 124  
 125  
 126  
 127  
 128

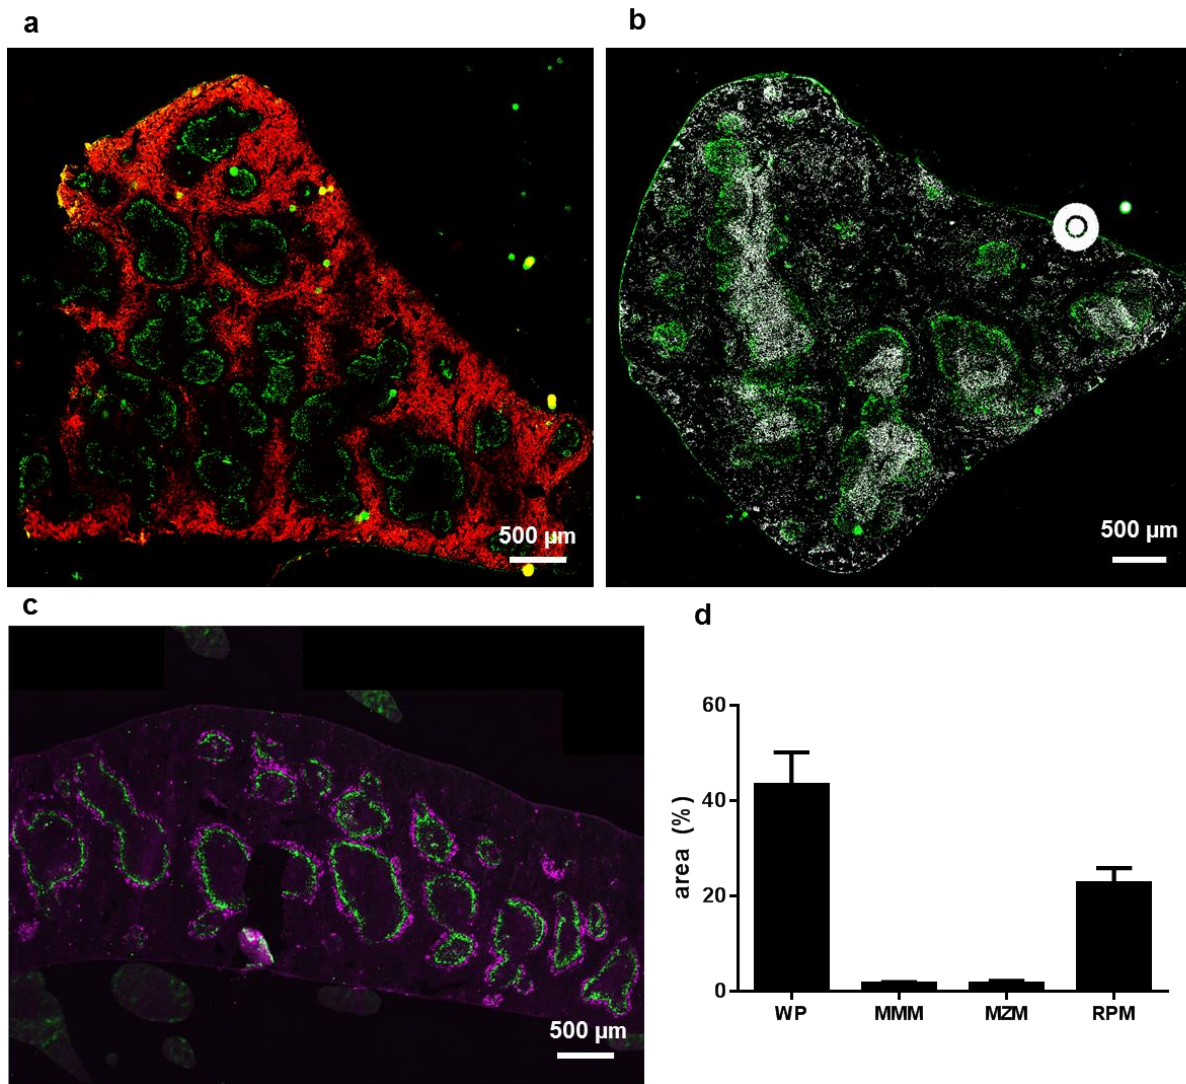

130

131

132

133

134

135

136

137

138

139

140

141

142

143

144

**Supplementary Figure 4: Quantification of mouse spleen compartments.** Fluorescent images of infected mouse spleens were acquired using a fully motorised Nikon Eclipse Ti microscope. The representative images were then analysed using ImageJ software to calculate the area of the different spleen compartments. Different staining combinations have been used to calculate the area of the different compartments for the red pulp (red,  $\alpha$ -F4/80, AF647), metallophilic area (green, Cr-Fc, AF568b), the marginal zone macrophages (magenta,  $\alpha$ -SIGN-R1, AF568) and the white pulp with a combination of B- and T-cell markers (white,  $\alpha$ -B220+ $\alpha$ -CD3, both AF647). For quantification, at least 5 sections for each staining combination have been analysed. The area of each staining was measured and the proportion with respect to the area of the section was calculated. In panel D the average area percentages (error bars represent standard deviation) of the different spleen compartments are reported. All the immunofluorescence images are representative of 5 sections from 3 different samples. Antibody details are in Table S1.

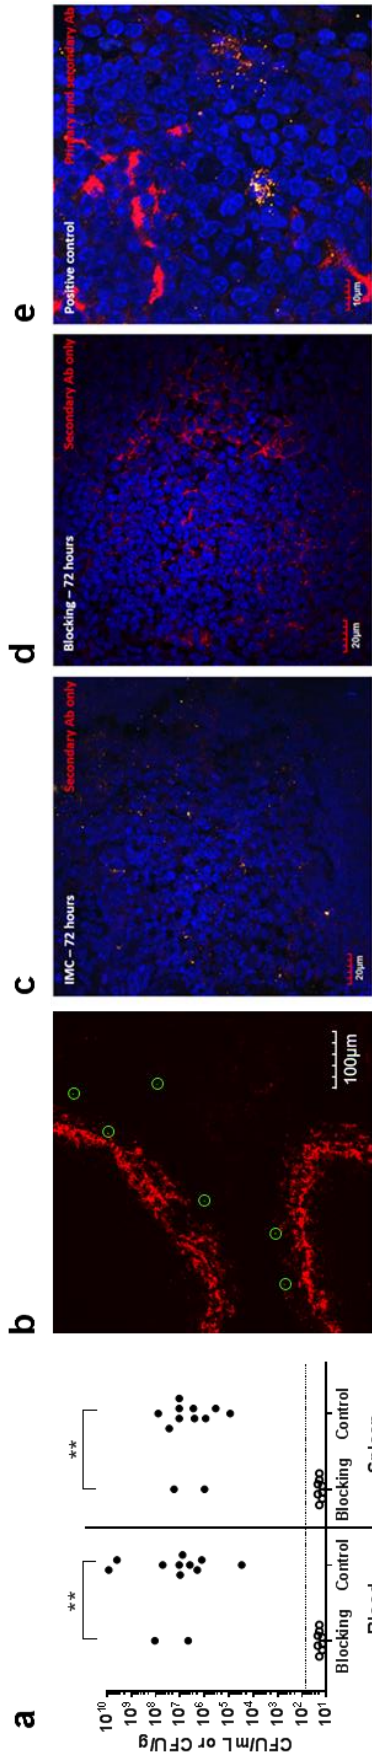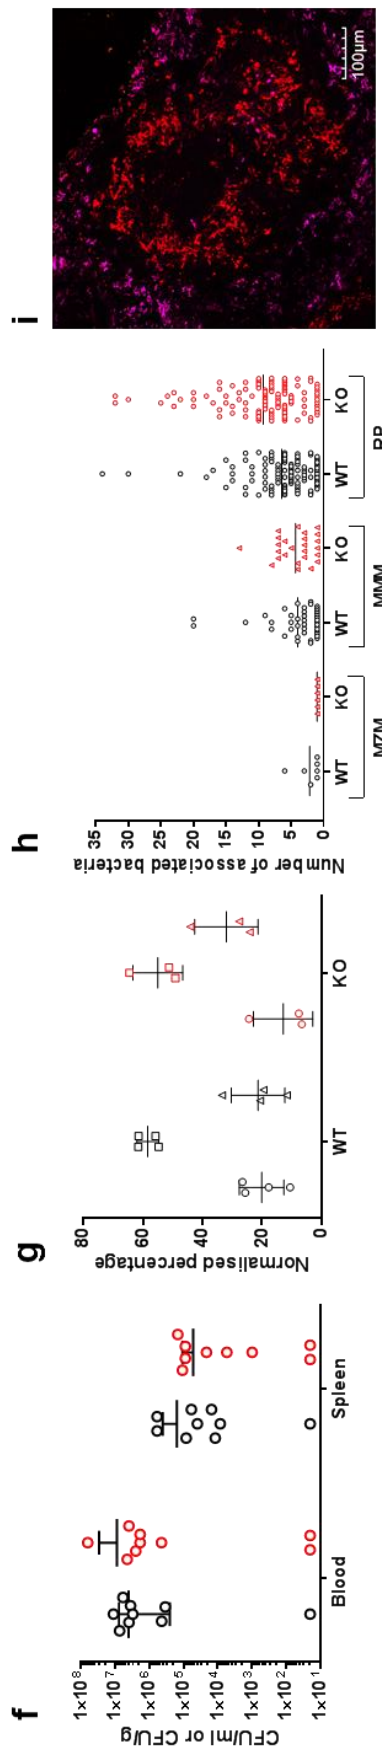

148 **Supplementary Figure 5: CD169 blocking and infection of CD169 knockout mouse**  
149 **strain.** Blocking experiments in CD1 mice are shown in panels a to c while experiments in  
150 CD169 KO C57BL/6 mice are shown in panels f to i. The majority of CD1 mice infected i.v.  
151 with D39, after blocking the CD169 receptor with a specific antibody (Rat IgG2a,k, Clone:  
152 3D6.112), do not develop systemic infection after 72 hours (a). CFU were counted 72 hours  
153 after challenge or earlier if the animal was showing signs of disease (left, Isotype control,  
154 n=10, right, CD169 mAb, n=10). \*\* P < 0.01, Fisher's exact test, one tailed.  
155 Immunofluorescence on spleen sections 30 minutes after blocking and challenge is shown in  
156 panel b. The localisation of the antibody used for the blocking of CD169 was revealed using  
157 an Alexafluor 568 secondary antibody (red) showing a specific binding to the metallophilic  
158 macrophages ring. In the green circles, pneumococci (stained in green) can be observed to  
159 do not co-localise with the metallophilic macrophages. At 72h after antibody treatment the  
160 staining of metallophilic macrophages was tested by using only the secondary antibody in  
161 samples pre-treated with an isotype matched control antibody (c) and the anti-CD169  
162 blocking antibody (d). A positive control spleen treated with both anti-CD169 antibody, and  
163 the secondary antibody are also shown (e). Nuclei are staining with DAPI (blue),  
164 Metallophilic macrophages are stained with an alexafluor-567-conjugated secondary  
165 antibody (red), and bacteria are staining with an alexafluor-488-conjugated secondary  
166 antibody (green). Further antibody details can be found in Table S1. Panels f to i report data  
167 on CD169 KO mice. (f) Number of CFU/g of spleen, or CFU/mL of blood from WT (black  
168 symbols, n=9) C57BL/6 mice, or sialoadhesin knock-out mice (red symbols, n=9) 6 hour  
169 after intravenous infection with *S. pneumoniae* D39. Lines represent the mean while error  
170 bars the standard deviation. (g) Shows the relative distribution of infectious foci in WT and  
171 KO mice to different splenic compartments, normalised against the total area of the spleen  
172 formed from that compartment (5 sections of 3 spleens analysed). Open circles; marginal  
173 zone macrophages, open squares; metallophilic macrophages, open triangles; red pulp  
174 macrophages. Lines represent the mean while error bars the standard deviation. (h) Shows  
175 the number of bacteria in each focus (size of foci) localised to each splenic macrophage  
176 compartment in both WT and KO mice (30 microscope fields from 3 different spleens were  
177 analysed at 60X magnification). Black symbols; WT mice, red symbols; KO mice. (i)  
178 Microscopy on knock-out mice spleen show that despite the lack of CD169, the metallophilic  
179 macrophages are still present in a ring-like structure bind to Cr-Fc (red, Cr-Fc, AF568b), in  
180 magenta red pulp macrophages are also stained ( $\alpha$ -F4/80, AF647). In all the graphs lines  
181 represent the mean and error bars the standard deviation. All the immunofluorescence  
182 images are representative of 5 sections from 3 different samples. Antibody details are in  
183 Table S1.  
184



185

186 **SupplementaryTables**

187

188 **Supplementary Table 1: Antibodies and microscopy reagents**

| Antibody                                       | Abbreviation       | Specificity                         | Conjugated          | Catalogue       | Supplier                  |
|------------------------------------------------|--------------------|-------------------------------------|---------------------|-----------------|---------------------------|
| Anti-mouse/human CD45R/B220                    | $\alpha$ -B220     | B cells                             | no                  | 103211          | Biologend                 |
| Anti-mouse CD3                                 | $\alpha$ -CD3      | T cells                             | no                  | ab33429         | Abcam                     |
| Anti-mouse CD169 (Siglec-1)                    | $\alpha$ -CD169    | Metallophilic M $\Phi$ <sup>a</sup> | no                  | 142401          | Biologend                 |
| Rat IgG2a control                              | IMC                | N/A                                 | no                  | 400501          | Biologend                 |
| CR-Fc                                          | CR-Fc              | Metallophilic M $\Phi$              | no                  |                 | <sup>66</sup>             |
| Anti-mouse F4/80                               | $\alpha$ -F4/80    | Red pulp M $\Phi$                   | no                  | 14-4801-81      | eBioscience               |
| Anti-mouse SIGN-R1 [ER-TR9]                    | $\alpha$ -SIGN-R1  | Marginal zone M $\Phi$              | no                  | ab37220         | abcam                     |
| Anti-mouse [ER-TR9] to SIGN Related 1 (Biotin) | $\alpha$ -SIGN-R1b | Marginal zone M $\Phi$              | biotinylated        | ab51819         | abcam                     |
| Anti-mouse Ly-6G (GR1)                         | $\alpha$ -GR1      | Neutrophils                         | no                  | 127602          | Biologend                 |
| Anti-porcine CD169 3B11/11                     | $\alpha$ -CD169p   | CD169+ M $\Phi$                     | no                  | MCA2316GA       | Biorad                    |
| Anti-porcine CD163 2A10/11                     | $\alpha$ -CD163    | CD163+ M $\Phi$                     | no                  | MCA2311GA       | Biorad                    |
| Anti-human CD3   CD3-12                        | $\alpha$ -CD3      | T cells                             | no                  | MCA1477A48<br>8 | Biorad                    |
| Anti-pneumococcal type 2 capsule               | $\alpha$ -type2    | Bacteria                            | no                  | 16745           | Statens<br>Serum Institut |
| Anti-pneumococcal type 4 capsule               | $\alpha$ -type4    | Bacteria                            | no                  | 16747           | Statens<br>Serum Institut |
| Chicken anti-Rabbit IgG (H+L)                  | AF488              | Secondary Ab <sup>b</sup>           | Alexa<br>Fluor® 488 | A-21441         | Thermoscientific          |
| Goat anti-Rat IgG (H+L)                        | AF568              | Secondary Ab                        | Alexa<br>Fluor® 568 | A-11077         | Thermoscientific          |
| Chicken anti-Rat IgG (H+L)                     | AF647              | Secondary Ab                        | Alexa<br>Fluor® 647 | A-21441         | Thermoscientific          |
| Goat anti-Human IgG (H+L)                      | AF568b             | Secondary Ab                        | Alexa<br>Fluor® 568 | A-21090         | Life technologies         |
| Goat anti-Mouse IgG (H+L)                      | AF568c             | Secondary Ab                        | Alexa<br>Fluor® 568 | A-11004         | Thermoscientific          |
| Streptavidin 488 Conjugate                     | AF488s             | Biotin                              | Alexa<br>Fluor® 488 | S32354          | Thermoscientific          |
| Wheat Germ Agglutinin                          | AF633              | Membranes                           | Alexa<br>Fluor® 633 | 11550816        | Molecular<br>Probes       |
| Phalloidin                                     | pAF647             | Actin                               | Alexa<br>Fluor® 647 | A22287          | Thermoscientific          |

189 <sup>a</sup> M $\Phi$  macrophage, <sup>b</sup> Ab antibody

190

191

192 **Supplementary Table 2: Detection of GFP and RFP labelled bacteria in splenic foci**

| sample | GFP bacteria | RFP bacteria | both GFP and RFP |
|--------|--------------|--------------|------------------|
| 1.1*   | 1            | 2            | 0                |
| 1.2    | 2            | 1            | 0                |
| 1.3    | 4            | 2            | 0                |
| 1.4    | 2            | 0            | 0                |
| 1.5    | 5            | 6            | 0                |
| 1.6    | 4            | 2            | 0                |
| 1.7    | 0            | 4            | 0                |
| 2.1    | 3            | 2            | 0                |
| 2.2    | 1            | 1            | 0                |
| 2.3    | 3            | 5            | 0                |
| 2.4    | 2            | 3            | 0                |
| 2.5    | 1            | 0            | 0                |
| 2.6    | 1            | 2            | 0                |
| TOTAL  | 29           | 30           | 0                |

193 \* Seven and six samples were analysed respectively from two spleens

194

195

196

197

198

199

200

201

202 **Supplementary Table 3: Primers for construction of strains expressing recombinant**203 ***nanA***

| <b>Name</b> | <b>Sequence (5' – 3')</b>                               | <b>Target region</b> |
|-------------|---------------------------------------------------------|----------------------|
| Sial_F1     | CCAAGAGATTACTATGCACGA                                   | Lectin-like          |
| Sial_R1     | AGATTATATCACATTATCCATTAAAAATCAAACCGTTTTCTCTGTAAAGCCGC   | domain               |
| Sial_R1*    | CCAATTGAAGGGTTGGAGCCGTTTTCTCTGTAAAGCCGC                 | upstream flank       |
| Sial_F2*    | GCGGCTTTAACAGAGAAAACGGCTCCAACCCTTCAATTGG                | Lectin-like          |
| Sial_F2     | CAAAAGCATAAGGAAAGGGGCCGCTCCAACCCTTCAATTGG               | domain               |
| Sial_R2     | TGTTTCAGGAAGTGCTGC                                      | downstream<br>flank  |
| Lect_F1     | GGATTGAGCAGGAAGTATG                                     | Sialidase            |
| Lect_R1     | AGATTATATCACATTATCCATTAAAAATCAAACCTCGTGCATAGTAATCTCTTGG | domain               |
| Lect_R1*    | CGTTTTCTCTGTAAAGCCGCTCGTGCATAGTAATCTCTTGG               | upstream flank       |
| Lect_F2*    | CCAAGAGATTACTATGCACGAGCGGCTTTAACAGAGAAAACG              | Sialidase            |
| Lect_F2     | CAAAAGCATAAGGAAAGGGGCCGCGCTTTAACAGAGAAAACG              | domain               |
| Lect_R2     | GAAGTAGATATTGCCTAGTAATTGG                               | downstream<br>flank  |

204
